# Supplementary material
Source: publisher site journal article supplement (http://www.kjim.org/upload/media/kjim-2019-210-suppl.pdf)
Supplement: Supplementary file 1 [file kjim-2019-210-suppl.pdf]

**Supplementary Table 1. Clinical characteristics at the time of chemotherapy and treatment outcomes**

| Characteristic                    | Total (n = 90) |
|-----------------------------------|----------------|
| Stage (Rai system)                |                |
| o                                 | 23 (25.6)      |
| I                                 | 13 (14.4)      |
| II                                | 14 (15.6)      |
| III                               | 20 (22.2)      |
| IV                                | 19 (21.1)      |
| Unknown                           | 1 (1.1)        |
| Stage (Binet system)              |                |
| A                                 | 45 (50.0)      |
| B                                 | 11 (12.2)      |
| C                                 | 33 (36.7)      |
| Unknown                           | 1 (1.1)        |
| Constitutional symptom (n = 88)   |                |
|                                   | 12 (13.3)      |
| Response to 1st line chemotherapy |                |
| CR                                | 16 (17.8)      |
| PR                                | 47 (52.2)      |
| SD                                | 20 (22.2)      |
| PD                                | 4 (4.4)        |
| Unknown                           | 2 (2.2)        |
| Death in cytopenia                |                |
|                                   | 1 (1.1)        |

Values are presented as number (%).

CR, complete remission; PR, partial remission; SD, stable disease; PD, progressive disease.
